# Supplementary material for: An insight into the sequestration of tetra and hexavalent actinides by tri ethoxysilyl-amino-propyl-3-oxa-glutaramic acid (SAPOGA) functionalized titania
Source: Royal Society of Chemistry journal article supplement (doi:10.1039/d2cp03722j), 2022-01-01
Supplement: d2cp03722j1.pdf [file d2cp03722j1.pdf]

**Supporting Information**

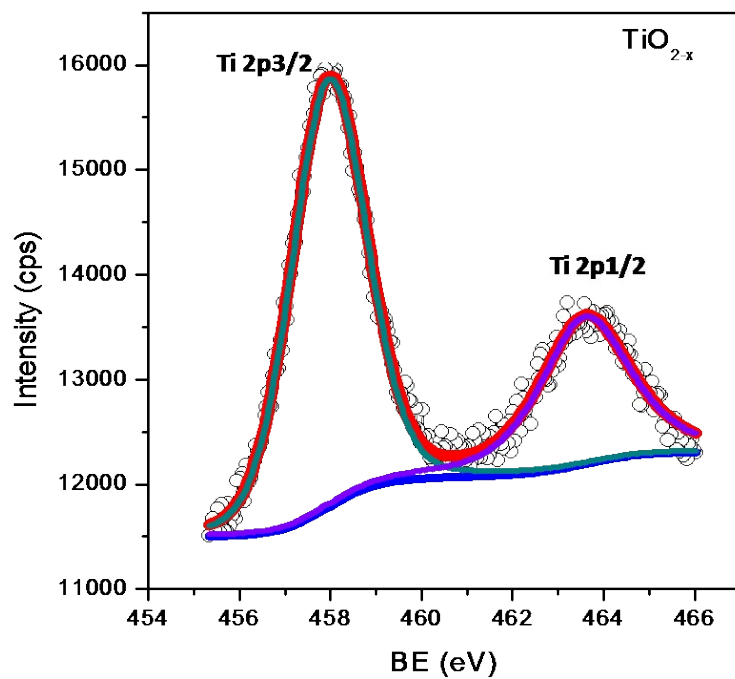

**SI Fig. 1:** XPS spectra for TiO<sub>2</sub> precursor for Ti peak



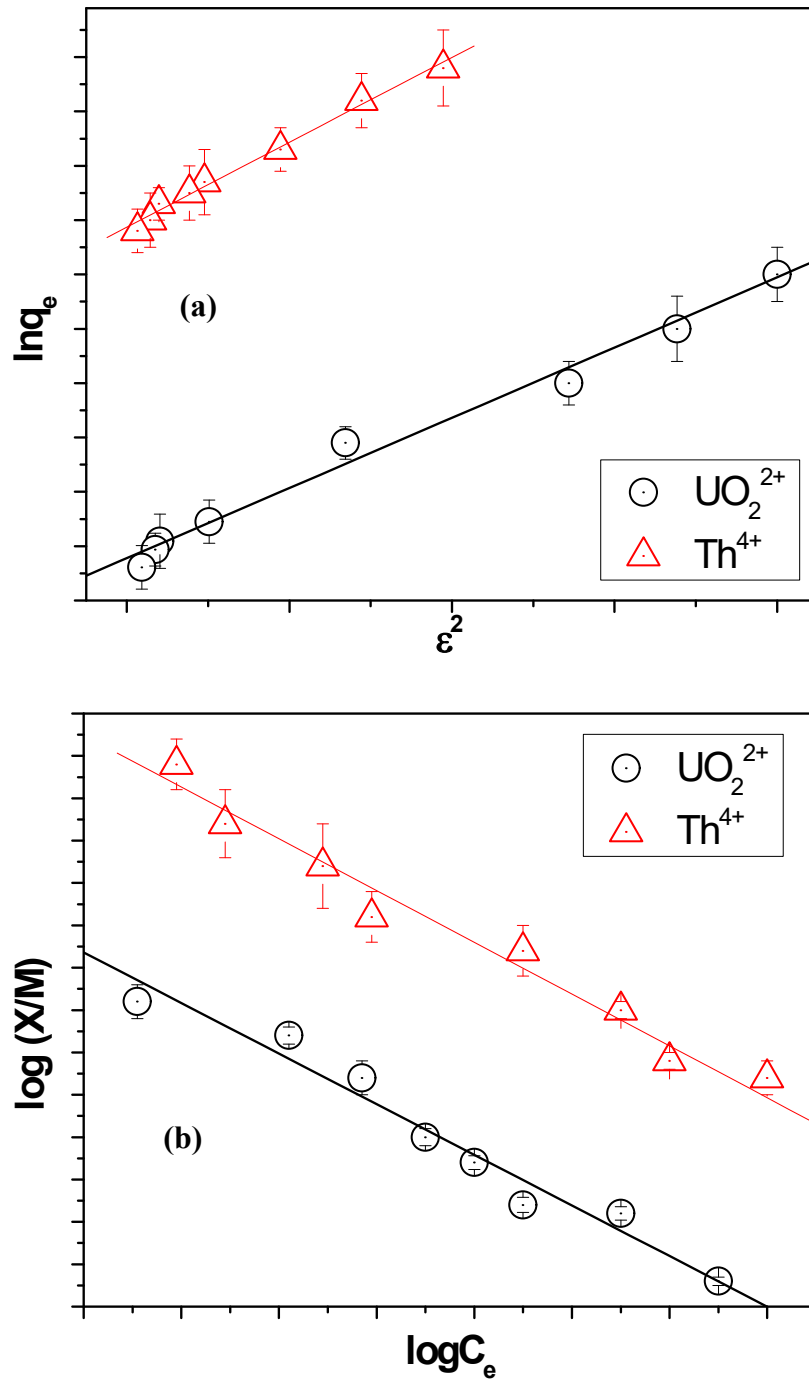

**SI Fig. 3:** The linear regression analysis for (a) Dubbin-Radushkevich (D-R) isotherm; and (b) Freundlich isotherm

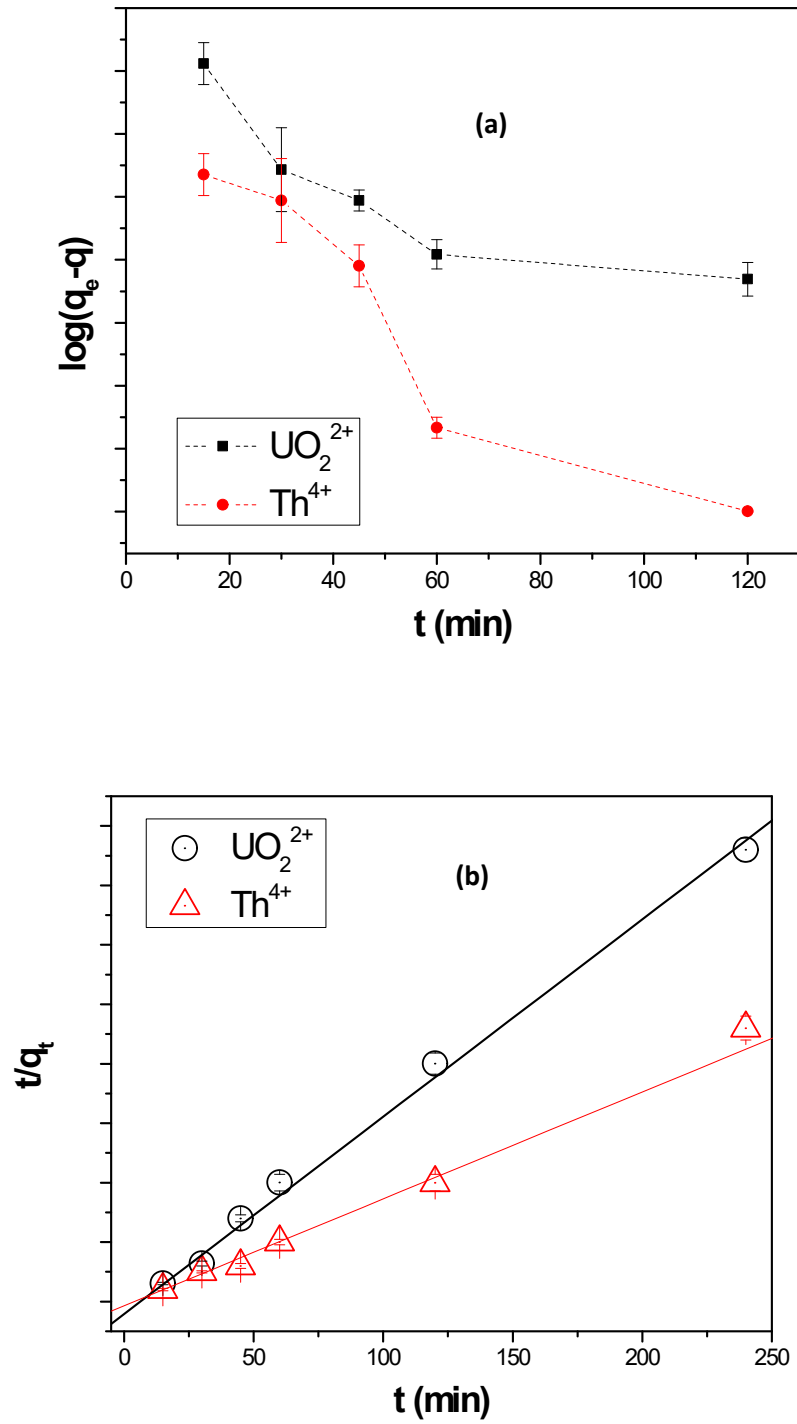

SI Fig. 4: Linear regression analysis for (a) Lagergren pseudo 1<sup>st</sup> order kinetics;  
 (b) Pseudo 2<sup>nd</sup> order kinetics model

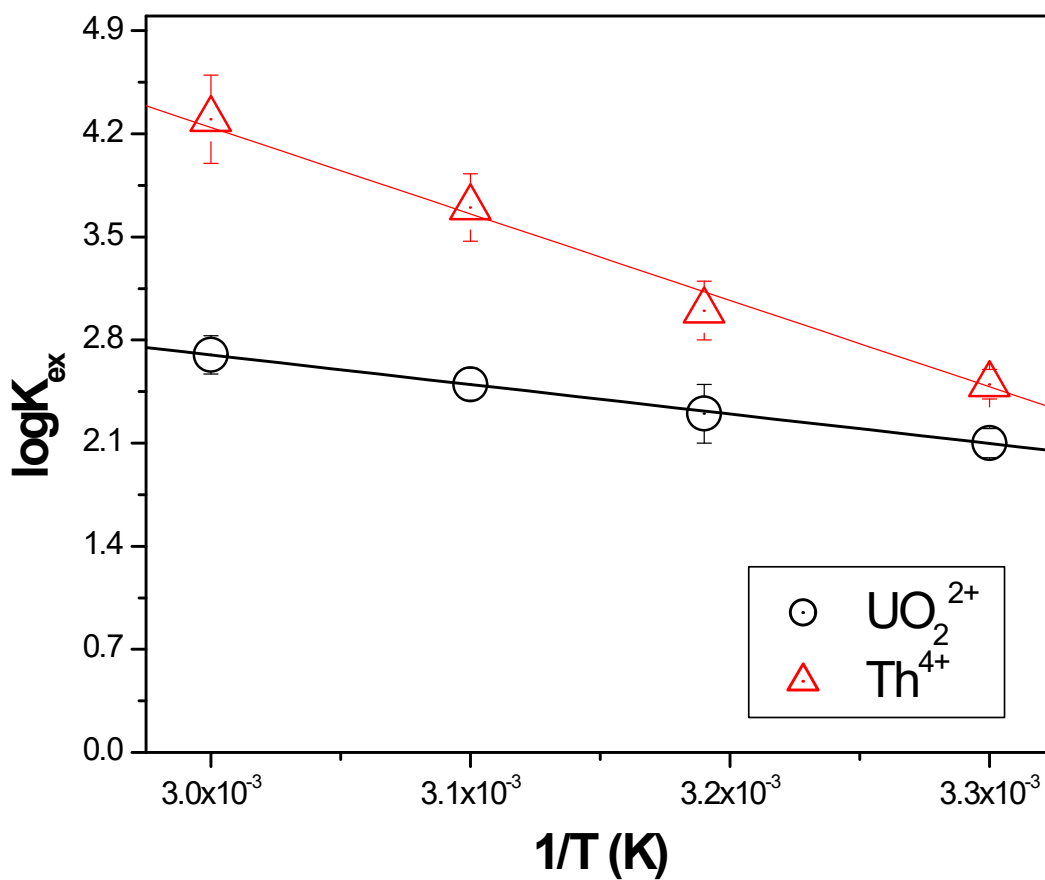

**SI Fig. 5:** The variation in conditional extraction constants for UO<sub>2</sub><sup>2+</sup> and Th<sup>4+</sup> on SAPOGA-TiO<sub>2</sub> as a function of reciprocal of absolute temperature

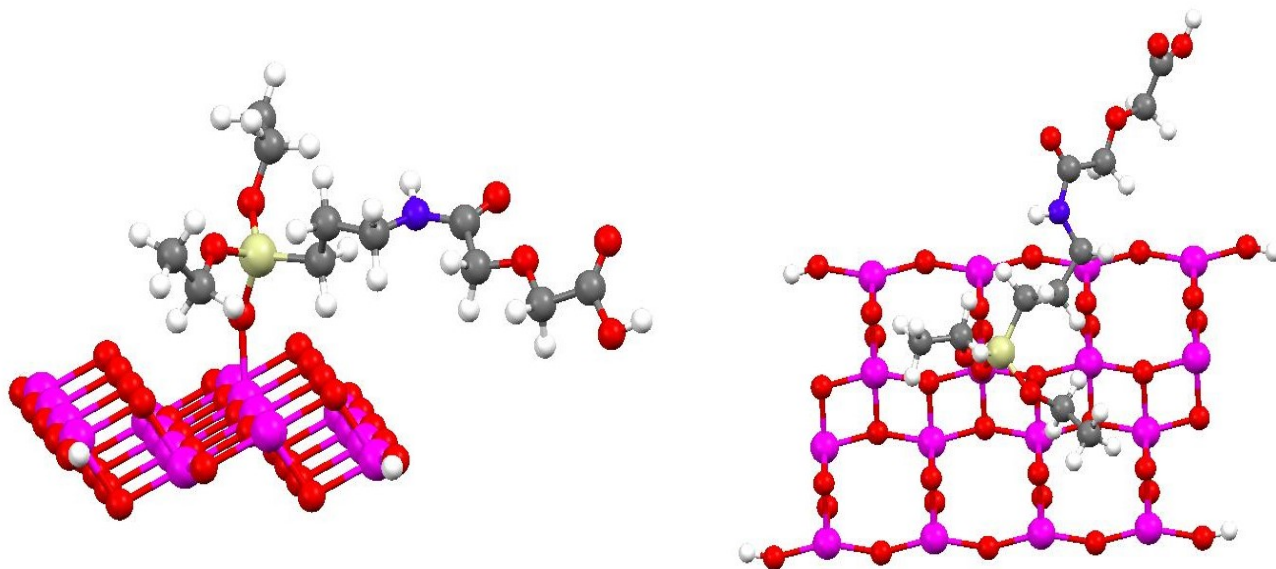

SI Fig. 6: The optimized structure for the sorbent SAPOGA-TiO<sub>2</sub>

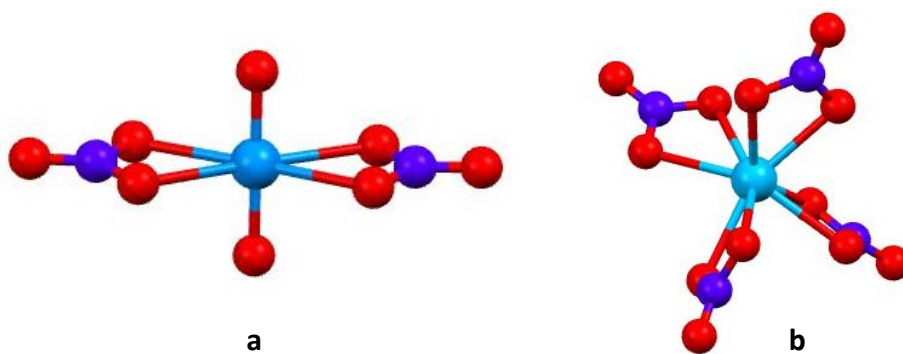

SI Fig. 7: The optimized structure of (a) UO<sub>2</sub>(NO<sub>3</sub>)<sub>2</sub> and (b) Th(NO<sub>3</sub>)<sub>4</sub>

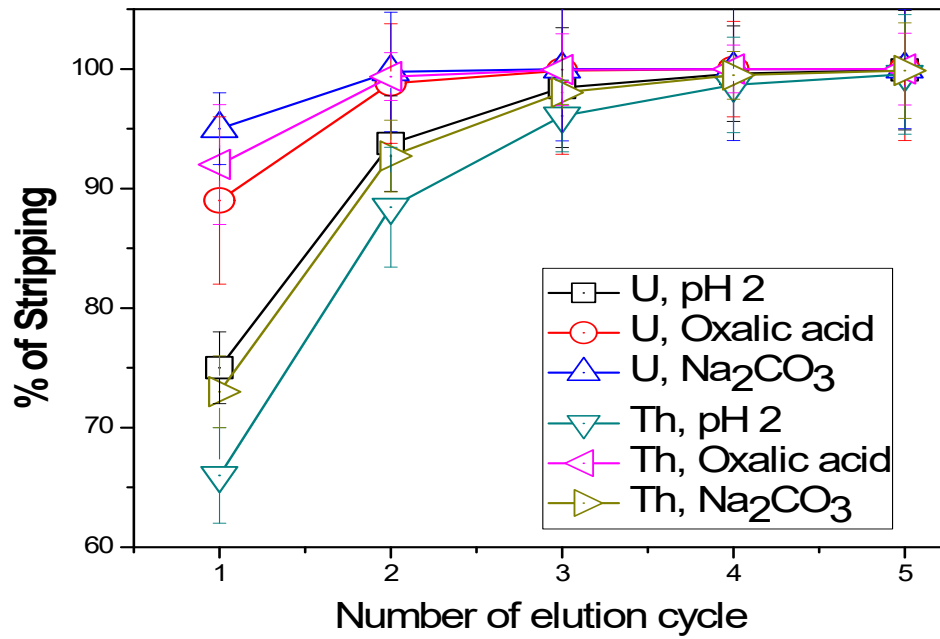

**SI Fig. 8:** Cumulative % stripping of metal ions using multiple contacts of aqueous phase complexing agents

**SI Table.1:** Analytical results obtained by linear regression analysis of the experimentally obtained data using Langmuir, D-R, and Freundlich isotherm models

|             | Langmuir        |                |          | Dubinin-Radushkevich |                 |          | Freundlich         |     |            |
|-------------|-----------------|----------------|----------|----------------------|-----------------|----------|--------------------|-----|------------|
|             | $q_e$<br>(mg/g) | $b$<br>(l/mol) | $\chi^2$ | $x_m$<br>(mg/g)      | $E$<br>(kJ/mol) | $\chi^2$ | $K_f$ (mmol/g<br>) | $n$ | $\chi^2$   |
| $UO_2^{2+}$ | 231             | 0.05           | 0.9989   | 200                  | 15.7            | 0.9875   | 115                | 9   | 0.989<br>0 |
| $Th^{4+}$   | 458             | 0.08           | 0.9972   | 381                  | 19.0            | 0.9842   | 154                | 13  | 0.986<br>7 |

**SI Table.2:** The linear regression analysis of the experimentally obtained data using Lagergren 1<sup>st</sup> order, Intra particle diffusion and Pseudo 2<sup>nd</sup> order kinetics models

|             | Lagergren first order kinetics model |           |          | Intra particle diffusion model                   |     |              | Pseudo 2 <sup>nd</sup> order model |                                                  |          |
|-------------|--------------------------------------|-----------|----------|--------------------------------------------------|-----|--------------|------------------------------------|--------------------------------------------------|----------|
|             | $q_e$                                | $k_{ads}$ | $\chi^2$ | $k_p$<br>(mg g <sup>-1</sup> min <sup>-1</sup> ) | $C$ | $\chi^2$     | $q_e$<br>(mg g <sup>-1</sup> )     | $k_2$<br>(mg g <sup>-1</sup> min <sup>-1</sup> ) | $\chi^2$ |
| $UO_2^{2+}$ | 66                                   | 0.08      | 0.7817   | 51                                               | 23  | 0.9997<br>0. | 88                                 | 5.8E-04                                          | 0.9973   |
| $Th^{4+}$   | 89                                   | 0.04      | 0.6866   | 48                                               | 29  | 9982         | 99                                 | 3.6E-04                                          | 0.9956   |

**SI Table.3:** Calculated structural parameters (bond length in Å) of complexes of  $UO_2^{2+}/Th^{4+}$  ion with SAPOGA-TiO<sub>2</sub> in presence of nitrate ion.

| System           | M-O <sub>C=O</sub> (Å) | M-O <sub>ethereal</sub> (Å) | M-O <sub>NO3</sub> (Å)                             |
|------------------|------------------------|-----------------------------|----------------------------------------------------|
| $UO_2(NO_3)_2-L$ | 2.423, 2.593           | 2.835                       | 2.442, 2.427, 2.504,<br>2.517                      |
| $Th(NO_3)_4-L$   | 2.441, 2.600           | 2.783                       | 2.515, 2.519, 2.453, 2.480,<br>2.597, 2.578, 2.518 |



**SI Table.4:** Calculated value of Gibbs free energy (kcal/mol) in the gas and aqueous phase

| Equilibrium reaction                                                                                                                                                                                     | Free energy of adsorption (kcal/mol) |               |
|----------------------------------------------------------------------------------------------------------------------------------------------------------------------------------------------------------|--------------------------------------|---------------|
|                                                                                                                                                                                                          | Gas phase                            | Aqueous phase |
| $[\text{UO}_2(\text{H}_2\text{O})_5]^{2+}_{(\text{aq})} + 2\text{NO}_3^-_{(\text{aq})} + \text{L}_{(\text{aq})} \longrightarrow \text{UO}_2(\text{NO}_3)_2\text{-L}_{(\text{aq})} + 5\text{H}_2\text{O}$ | -312.5                               | -30.2         |
| $[\text{Th}(\text{H}_2\text{O})_{10}]^{4+}_{(\text{aq})} + 4\text{NO}_3^-_{(\text{aq})} + \text{L}_{(\text{aq})} \longrightarrow \text{Th}(\text{NO}_3)_4\text{-L}_{(\text{aq})} + 10\text{H}_2\text{O}$ | -915.1                               | -83.7         |
| $\text{UO}_2(\text{NO}_3)_2_{(\text{aq})} + \text{L}_{(\text{aq})} \longrightarrow \text{UO}_2(\text{NO}_3)_2\text{-L}_{(\text{aq})}$                                                                    | -24.9                                | -6.6          |
| $\text{Th}(\text{NO}_3)_4_{(\text{aq})} + \text{L}_{(\text{aq})} \longrightarrow \text{Th}(\text{NO}_3)_4\text{-L}_{(\text{aq})}$                                                                        | -87.8                                | -36.8         |

**SI Table.5:** Calculated charge and orbital population using NBO analysis in aqueous phase at the B3LYP/TZVP level of theory.

| System                                      | charge | s    | p     | d     | f     |
|---------------------------------------------|--------|------|-------|-------|-------|
| $\text{UO}_2(\text{NO}_3)_2\text{-L}$       | 1.803  | 4.17 | 11.77 | 11.46 | 2.78  |
| $\text{Th}(\text{NO}_3)_4\text{-L}$         | 1.694  | 4.20 | 11.99 | 11.12 | 0.981 |
| $[\text{UO}_2(\text{H}_2\text{O})_5]^{2+}$  | 2.088  | 4.14 | 11.75 | 11.38 | 2.61  |
| $[\text{Th}(\text{H}_2\text{O})_{10}]^{4+}$ | 2.175  | 4.18 | 11.99 | 10.91 | 0.73  |
| $\text{UO}_2(\text{NO}_3)_2$                | 2.195  | 4.11 | 11.74 | 11.30 | 2.62  |
| $\text{Th}(\text{NO}_3)_4$                  | 2.382  | 4.15 | 11.99 | 10.86 | 0.59  |

**SI Table 6:** Average value of Wiberg bond Indices for metal-ligand and metal nitrate bonding.

| System                                | M-O(-C=O <sub>DGA</sub> ) | M-O(-ether O <sub>DGA</sub> ) | M-O (NO <sub>3</sub> ) |
|---------------------------------------|---------------------------|-------------------------------|------------------------|
| $\text{UO}_2(\text{NO}_3)_2\text{-L}$ | 0.334                     | 0                             | 0.461                  |
| $\text{Th}(\text{NO}_3)_4\text{-L}$   | 0.369                     | 0.073                         | 0.431                  |
